# Supplementary material
Source: MDPI journal article supplement (https://www.mdpi.com/2072-4292/15/2/342)
Supplement: s1 [file s1]

## Supplemental Material

**Table S1.** Confusion Matrix. The multiclass confusion matrix for the best model (gradient boosting, multiclass, difference imagery) on the test data set.

| Prediction | Reference               |           |        |          |                        |                       |                         |                        |        |
|------------|-------------------------|-----------|--------|----------|------------------------|-----------------------|-------------------------|------------------------|--------|
|            |                         | Retardant | Burned | Unburned | Cloud post-application | Cloud pre-application | Shadow post-application | Shadow pre-application | All    |
|            | Retardant               | 15575     | 0      | 20       | 0                      | 2                     | 0                       | 0                      | 15597  |
|            | Burned                  | 1552      | 40121  | 305      | 465                    | 1362                  | 6155                    | 27                     | 49987  |
|            | Unburned                | 7887      | 42     | 110458   | 749                    | 817                   | 0                       | 167                    | 120120 |
|            | Cloud post-application  | 1         | 0      | 4        | 11443                  | 0                     | 0                       | 1512                   | 12960  |
|            | Cloud pre-application   | 0         | 0      | 2        | 0                      | 6552                  | 2619                    | 0                      | 9173   |
|            | Shadow post-application | 312       | 0      | 0        | 0                      | 2514                  | 4322                    | 0                      | 7148   |
|            | Shadow pre-application  | 0         | 0      | 0        | 418                    | 0                     | 0                       | 10058                  | 10476  |
|            | All                     | 25327     | 40163  | 110789   | 13075                  | 11247                 | 13096                   | 11764                  | 225461 |

Performance of best model (gradient boosting, multiclass, difference imagery) with RGB (2,3,4) bands only.

Train Overall Accuracy: 0.680

Test Overall Accuracy: 0.802

Test Retardant Precision: 0.983

Test Retardant Recall: 0.479

Test Retardant F1 Score: 0.644

**Table S2.** Model Feature Importances. Model feature importances on a Random Forest single-class difference image classification.

| Band (Name) | 2 (Blue) | 3 (Green) | 4 (Red) | 5 (Red-edge) | 8 (NIR) | 11 (SWIR1) | 12 (SWIR2) |
|-------------|----------|-----------|---------|--------------|---------|------------|------------|
| Importance  | 0.108    | 0.162     | 0.201   | 0.114        | 0.108   | 0.084      | 0.223      |

**Table S3.** Scene ID. Sentinel-2 scenes used for model development and testing.

| Fire       | Date     | Scene(s) ID                                                                                                                           |
|------------|----------|---------------------------------------------------------------------------------------------------------------------------------------|
| Apple      | 20200727 | S2A_MSIL1C_20200727T182921_N0209_R027_T11SNT_20200727T221829.zip                                                                      |
| Apple      | 20200808 | S2A_MSIL1C_20200803T181931_N0209_R127_T11SNT_20200803T220613.zip                                                                      |
| Blue River | 20200529 | S2A_MSIL1C_20200529T175921_N0209_R041_T12SWC_20200529T213918.zip                                                                      |
| Blue River | 20200608 | S2A_MSIL1C_20200608T175921_N0209_R041_T12SWC_20200608T213845.zip                                                                      |
| Bobcat     | 20200801 | S2B_MSIL1C_20200801T182919_N0209_R027_T11SMT_20200801T220312.zip                                                                      |
| Bobcat     | 20200920 | S2B_MSIL1C_20200920T182949_N0209_R027_T11SMT_20200920T215931.zip                                                                      |
| Mammoth    | 20210601 | S2B_MSIL1C_20210601T180919_N0300_R084_T12SUG_20210601T213552.zip                                                                      |
| Mammoth    | 20210611 | S2B_MSIL1C_20210611T180919_N0300_R084_T12SUG_20210611T213307.zip                                                                      |
| Mescal     | 20210603 | S2A_MSIL1C_20210603T175911_N0300_R041_T12SVB_20210603T214958.zip,<br>S2A_MSIL1C_20210603T175911_N0300_R041_T12SWB_20210603T214958.zip |
| Mescal     | 20210613 | S2A_MSIL1C_20210613T175911_N0300_R041_T12SVB_20210613T215000.zip,<br>S2A_MSIL1C_20210613T175911_N0300_R041_T12SWB_20210613T215000.zip |
| Telegraph  | 20210603 | S2A_MSIL1C_20210603T175911_N0300_R041_T12SVB_20210603T214958.zip,<br>S2A_MSIL1C_20210603T175911_N0300_R041_T12SWB_20210603T214958.zip |
| Telegraph  | 20210613 | S2A_MSIL1C_20210613T175911_N0300_R041_T12SVB_20210613T215000.zip,<br>S2A_MSIL1C_20210613T175911_N0300_R041_T12SWB_20210613T215000.zip |
| Willow     | 20200613 | S2B_MSIL1C_20210613T184919_N0300_R113_T10SFF_20210613T205904.zip                                                                      |
| Willow     | 20200623 | S2B_MSIL1C_20210623T184919_N0300_R113_T10SFF_20210623T222031.zip                                                                      |

The scripts are stand-alone and should be run Script S1 then Script S2. To reproduce results, download the data listed in Table S3, ensure files are organized according to the script headers, and update user-defined values. The reference labels used in the study are located within the ‘input’ folder of the supplemental material.

**Script S1.** Model Training and Testing. Stand-alone script that trains a machine learning model to classify wildfire retardant from Sentinel-2 imagery, see “s1/model\_training\_testing.py”.

**Script S2.** Model Prediction. Stand-alone script that applies a machine learning model to classify wildfire retardant from Sentinel-2 imagery, see “s1/model\_prediction.py”.
